# Supplementary material for: Detection of oncogenic mutations in paired circulating tumor DNA and circulating tumor cells in patients with hepatocellular carcinoma
Source: PubMed Central journal article supplement (PMC8100622; doi:10.1016/j.tranon.2021.101073), 2021-04-26
Supplement: mmc1.pdf [file mmc1.pdf]

## **Supplemental Material and Methods**

### **Immunohistochemistry (IHC)**

To estimate the frequency of HCC patients with EpCAM expressing tumors cells, expression of EpCAM was determined on tumor cells using tissue microarrays with cores of normal liver tissue (obtained from livers of multi-organ donors), tumors and paired tumor-free liver tissues from 109 HCC-patients by immunohistochemistry (cohort and tissue micro-arrays were described previously) <sup>1, 2</sup>. The TMAs were immunohistochemically stained by the department of pathology of Erasmus MC. IHC was performed with an automated, validated and accredited staining system (Ventana Benchmark ULTRA, Ventana Medical Systems, Tucson, AZ, USA) using Optiview universal DAB detection Kit (#760-700). In brief, following deparaffinization and heat-induced antigen retrieval the tissue samples were incubated according to their optimized time with CD155. Incubation was followed by hematoxylin II counter stain for 12 minutes and then a blue coloring reagent for 8 minutes according to the manufactures instructions (Ventana). The immunohistochemically stained TMAs were then scanned using NanoZoomer 2.0HT (Hamamatsu) and scored blindly by two researchers, based on the intensity of staining (0[none],1[low], 2[intermediate], 3[strong]) and the frequency of positive tumor cells or hepatocytes (A[<10%], B[10-50%], C[50-90%], D[>90%]). The score per core was calculated by multiplying the intensity by the frequency of positive cells (A=0.1, B=0.3, C=0.7 and D=1), and then the average score per tissue was calculated by taking the average of the three scores.

### **References**

1. Sideras K, Bots SJ, Biermann K, et al. Tumour antigen expression in hepatocellular carcinoma in a low-endemic western area. *Br J Cancer* 2015;112:1911-20.
2. Sideras K, Biermann K, Verheij J, et al. PD-L1, Galectin-9 and CD8(+) tumor-infiltrating lymphocytes are associated with survival in hepatocellular carcinoma. *Oncoimmunology* 2017;6:e1273309.

**Supplementary Figure 1.**

**A**

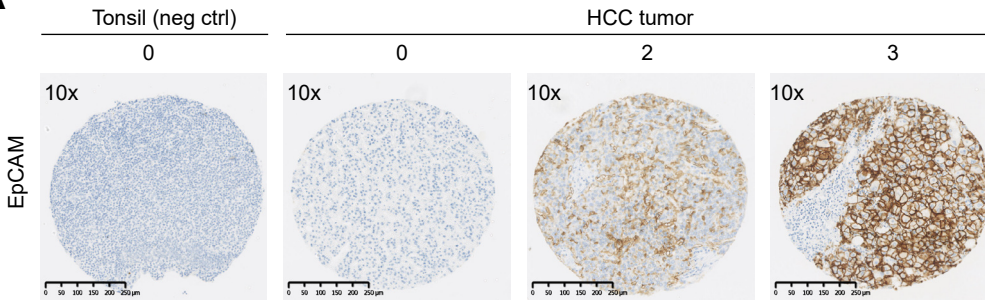

**B**

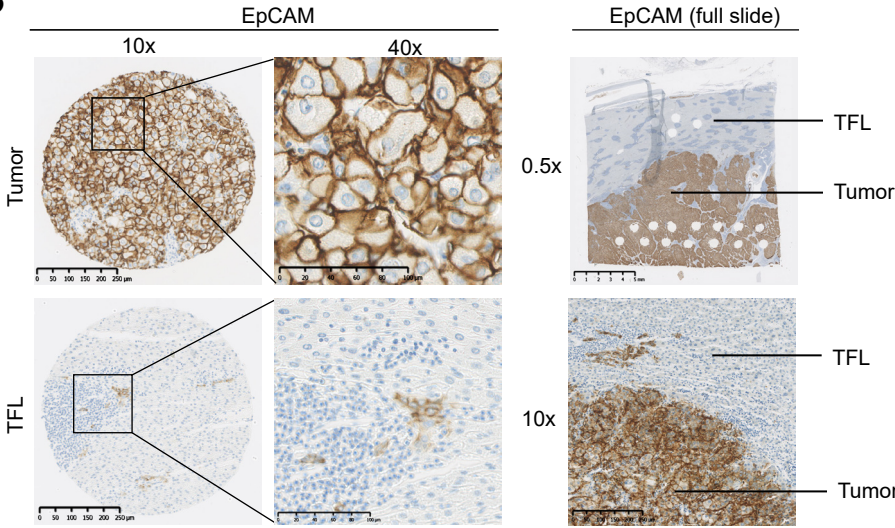

**C**

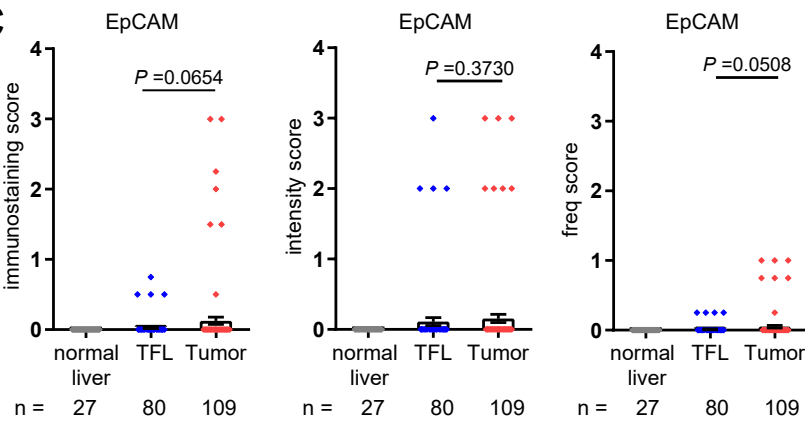

**D**

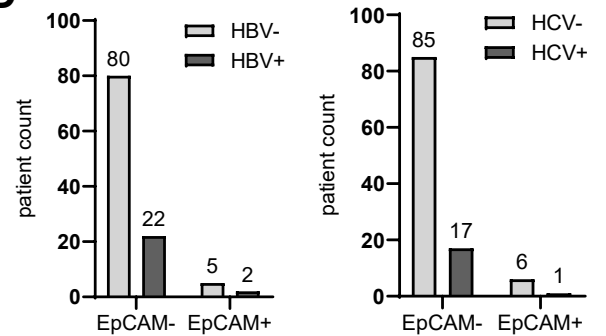

**Fig. S1. EpCAM expression in HCC tumors**

(A) Representative images of immunohistochemistry staining show EpCAM intensity scoring in tissue microarrays. Tonsil serves as negative control tissue. (B) Representative images of immunohistochemistry staining show EpCAM expression in HCC tumor and paired surrounding tumor-free liver (TFL) tissue. The immunostaining score for tumor is 3D and for TFL is 0. The full tissue section of this patient is also shown. Scale bars are presented in each image. (C) The immunostaining score, intensity score and frequency score of EpCAM in individual patients is presented (n=109). Significance was assessed by Wilcoxon matched-pairs signed rank test.  $P < 0.05$  is considered statistically significant. (D) The associations of EpCAM positivity of tumors with HBV/HCV infections are shown.

## Supplementary Figure 2.

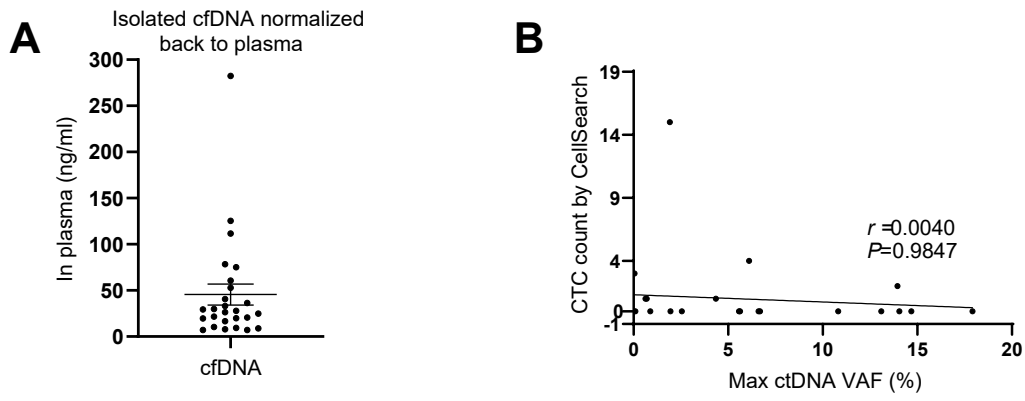

**Fig. S2. CfDNA amount and the correlation between ctDNA VAF and CTC count**

(A) The isolated cfDNA amount normalized to per ml plasma. (B) The correlation between CTC count and maximal ctDNA VAF.

**Supplementary Table 1. An overview of ctDNA mutations and CTC count in advanced HCC patients**

| Patients | Total no. of mutations in cfDNA | Mutated Genes VAF (%) |       |        |        |      | Count<br>EpCAM+ CTCs |
|----------|---------------------------------|-----------------------|-------|--------|--------|------|----------------------|
|          |                                 | TERT C228T            | TP53  | CTNNB1 | PIK3CA | NRAS |                      |
| 1        | 1                               | 17.92                 |       |        |        |      | 0                    |
| 2        | 2                               | 6.61                  | 3.61  |        |        |      | 0                    |
| 3        | 1                               | 6.11                  |       |        |        |      | 4                    |
| 4        | 1                               | 5.57                  |       |        |        |      | 0                    |
| 5        | 2                               | 5.39                  |       | 5.63   |        |      | 0                    |
| 6        | 4                               | 4.35                  | 0.29  | 1.73   | 0.35   |      | 1                    |
| 7        | 2                               | 3.95                  | 10.82 |        |        |      | 0                    |
| 8        | 3                               | 3.87                  |       | 14.68  | 13.99  |      | 0                    |
| 9        | 2                               | 3.67                  |       |        | 13.09  |      | 0                    |
| 10       | 1                               | 2.55                  |       |        |        |      | 0                    |
| 11       | 1                               | 1.95                  |       |        |        |      | 0                    |
| 12       | 1                               | 1.92                  |       |        |        |      | 15                   |
| 13       | 2                               | 1.50                  | 14.05 |        |        |      | 0                    |
| 14       | 1                               | 0.88                  |       |        |        |      | 0                    |
| 15       | 1                               | 0.69                  |       |        |        |      | 1                    |
| 16       | 2                               | 0.63                  | 0.28  |        |        |      | 1                    |
| 17       | 2                               | 0.35                  |       |        |        | 6.68 | 0                    |
| 18       | 1                               | 0.09                  |       |        |        |      | 0                    |
| 19       | 2                               | 0.09                  | 13.95 |        |        |      | 2                    |
| 20       | 1                               | 0.05                  |       |        |        |      | 3                    |
| 21       | 0                               |                       |       |        |        |      | 0                    |
| 22       | 0                               |                       |       |        |        |      | 0                    |
| 23       | 0                               |                       |       |        |        |      | 0                    |
| 24       | 0                               |                       |       |        |        |      | 0                    |
| 25       | 0                               |                       |       |        |        |      | 0                    |
| 26       | 0                               |                       |       |        |        |      | 0                    |
|          | Total                           | 20                    | 6     | 3      | 3      | 1    | 7                    |

Color scale: stronger color indicates higher frequency or number.

**Supplementary Table 2. An overview of ctDNA mutation hotspots detected in HCC by NGS**

| Patient | Gene ID | Allele name | Mutation | VAF(%) | Chromosome location |
|---------|---------|-------------|----------|--------|---------------------|
| 2       | TP53    | p.R283P     | C->G     | 3.61   | Chr17_7577118       |
| 7       | TP53    | p.P278T     | G->T     | 10.82  | Chr17_7577118       |
| 13      | TP53    | p.R248W     | G->A     | 14.05  | Chr17_7577547       |
| 16      | TP53    | p.R249S     | C->A     | 0.28   | Chr17_7577547       |
| 19      | TP53    | p.R249S     | C->A     | 13.95  | Chr17_7577547       |
| 5       | CTNNB1  | p.T41A      | A->G     | 5.63   | Chr3_41266125       |
| 6       | CTNNB1  | p.T41A      | A->G     | 1.73   | Chr3_41266125       |
|         | PIK3CA  | p.Q546R     | A->G     | 0.35   | SP_27.58329         |
|         | TP53    | p.R282W     | G->A     | 0.29   | Chr17_7577118       |
| 8       | CTNNB1  | p.S45P      | T->C     | 14.68  | Chr3_41266125       |
|         | PIK3CA  | p.Q546K     | C->A     | 13.99  | SP_27.58329         |
| 9       | PIK3CA  | p.E542K     | G->A     | 13.09  | SP_27.58329         |
| 17      | NRAS    | p.Q61K      | G->T     | 6.68   | SP_1.225761         |

**Supplementary Table 3. Univariate and multivariate analysis of overall survival by Cox regression model**

| Clinicopathologic parameters | Univariate           |                | Multivariate         |                |
|------------------------------|----------------------|----------------|----------------------|----------------|
|                              | HR (95% CI)          | <i>P</i> value | HR (95%CI)           | <i>P</i> value |
| ctDNA status: neg vs pos     | 5.382 (1.215-23.849) | 0.027          | 3.996 (0.727-21.955) | 0.111          |
| CTC count: <2 vs ≥2          | 2.195 (0.679-7.093)  | 0.189          |                      |                |
| Age, y: <60 vs ≥60           | 0.415 (0.156-1.102)  | 0.077          |                      |                |
| Cirrhosis: yes vs no         | 0.499 (0.187-1.331)  | 0.165          |                      |                |
| Tumor size:<10 vs ≥10        | 2.401 (0.685-8.416)  | 0.171          |                      |                |
| Tumor number: 1 vs >1        | 0.578 (0.214-1.561)  | 0.280          |                      |                |
| MVI: yes vs no               | 3.101 (1.111-8.654)  | 0.031          | 1.567 (0.489-5.023)  | 0.450          |
| AFP: < 20 vs ≥20             | 1.586 (0.615-4.088)  | 0.340          |                      |                |

**Supplementary Table 4. Comparison of genes in current study to Totoki's study<sup>a</sup>**

| <i>gene</i>          | <i>Ge</i><br>( <i>n</i> =26) | <i>Totoki</i><br>( <i>n</i> =452) |
|----------------------|------------------------------|-----------------------------------|
| <i>TERT promoter</i> | 77%                          | 55%                               |
| <i>TP53</i>          | 23%                          | 31%                               |
| <i>CTNNB1</i>        | 12%                          | 31%                               |
| <i>PIK3CA</i>        | 12%                          | 1%                                |
| <i>NRAS</i>          | 4%                           | NA <sup>b</sup>                   |
| <i>APC</i>           | 0%                           | 2%                                |
| <i>BRAF</i>          | 0%                           | NA                                |
| <i>AKT1</i>          | 0%                           | NA                                |
| <i>EGFR</i>          | 0%                           | NA                                |
| <i>ERBB2</i>         | 0%                           | NA                                |
| <i>KRAS</i>          | 0%                           | NA                                |
| <i>GNAS</i>          | 0%                           | NA                                |
| <i>MAD4</i>          | 0%                           | NA                                |
| <i>MAP2K1</i>        | 0%                           | NA                                |
| <i>FBXW7</i>         | 0%                           | <1%                               |

- a. Study represented here: Totoki et al. Nature Genetics 2014.  
b. NA, not available. Because the frequency is not reported in the paper.

**Supplementary Table 5: Torrent Variant Caller parameter settings**

| Parameter *                  | Value  |
|------------------------------|--------|
| snp_min_allele_freq          | 0.0005 |
| snp_strand_bias              | 1      |
| hotspot_min_coverage         | 3      |
| sse_prob_threshold           | 1      |
| try_few_restart_freq         | 1      |
| hotspot_min_cov_each_strand  | 0      |
| indel_min_var_coverage       | 2      |
| hotspot_min_allele_freq      | 0.0005 |
| report_ppa                   | 0      |
| mnp_min_variant_score        | 6      |
| indel_func_size_offset       | 0      |
| hotspot_strand_bias          | 1      |
| filter_insertion_predictions | 0.2    |
| indel_min_variant_score      | 10     |
| indel_min_coverage           | 3      |
| heavy_tailed                 | 3      |
| snp_strand_bias_pval         | 0      |
| outlier_probability          | 0.001  |
| position_bias_ref_fraction   | 0.05   |
| indel_strand_bias_pval       | 0      |
| data_quality_stringency      | 20     |
| snp_min_cov_each_strand      | 0      |
| tag_sim_max_cov              | 10     |
| indel_as_hpindel             | 0      |
| hp_max_length                | 5      |
| mnp_strand_bias              | 1      |
| snp_min_coverage             | 3      |
| use_fd_param                 | 0      |
| hotspot_min_var_coverage     | 2      |
| mnp_strand_bias_pval         | 0      |
| min_ratio_for_fd             | 0.1    |
| hotspot_strand_bias_pval     | 0      |
| hotspot_min_variant_score    | 3      |
| max_flows_to_test            | 10     |
| mnp_min_var_coverage         | 2      |
| indel_strand_bias            | 1      |
| position_bias                | 0.75   |
| downsample_to_coverage       | 20000  |
| filter_unusual_predictions   | 0.1    |
| indel_min_allele_freq        | 0.0005 |
| mnp_min_allele_freq          | 0.0005 |
| mnp_min_coverage             | 3      |



|                             |             |
|-----------------------------|-------------|
| mnp_min_cov_each_strand     | 0           |
| fd_nonsnp_min_var_cov       | 1           |
| tag_trim_method             | sloppy-trim |
| prediction_precision        | 1           |
| indel_min_cov_each_strand   | 0           |
| filter_deletion_predictions | 0.2         |
| min_tag_fam_size            | 3           |
| snp_min_variant_score       | 6           |
| suppress_recalibration      | 0           |
| position_bias_pval          | 0.05        |
| use_position_bias           | 0           |
| snp_min_var_coverage        | 2           |

\* For detailed description of each parameter please read the Torrent Suite software user Guide 5.10:

[https://assets.thermofisher.com/TFS-Assets/LSG/manuals/MAN0017598\\_TorrentSuiteSoftware\\_5\\_10\\_UG.pdf](https://assets.thermofisher.com/TFS-Assets/LSG/manuals/MAN0017598_TorrentSuiteSoftware_5_10_UG.pdf)
